# Supplementary material for: Type III ATP synthase is a symmetry-deviated dimer that induces membrane curvature through tetramerization
Source: PubMed Central journal article supplement (PMC7583250; doi:10.1038/s41467-020-18993-6), 2020-10-22
Supplement: 41467_2020_18993_MOESM1_ESM.pdf [file 41467_2020_18993_MOESM1_ESM.pdf]

## Supplementary Information

### **Type III ATP synthase is a symmetry-deviated dimer that induces membrane curvature through tetramerization**

Rasmus Kock Flygaard<sup>1,2†</sup>, Alexander Mühleip<sup>1,2†</sup>, Victor Tobiasson<sup>1,2</sup> and Alexey Amunts<sup>1,2\*</sup>

<sup>1</sup> Science for Life Laboratory, Department of Biochemistry and Biophysics, Stockholm University, 17165 Solna, Sweden.

<sup>2</sup> Department of Medical Biochemistry and Biophysics, Karolinska Institute, 17177 Stockholm, Sweden.

† Both authors contributed equally to this work.

\* email: [amunts@scilifelab.se](mailto:amunts@scilifelab.se)

#### **This file includes:**

Supplementary Fig. 1 to 14  
Supplementary Tables 1 to 2

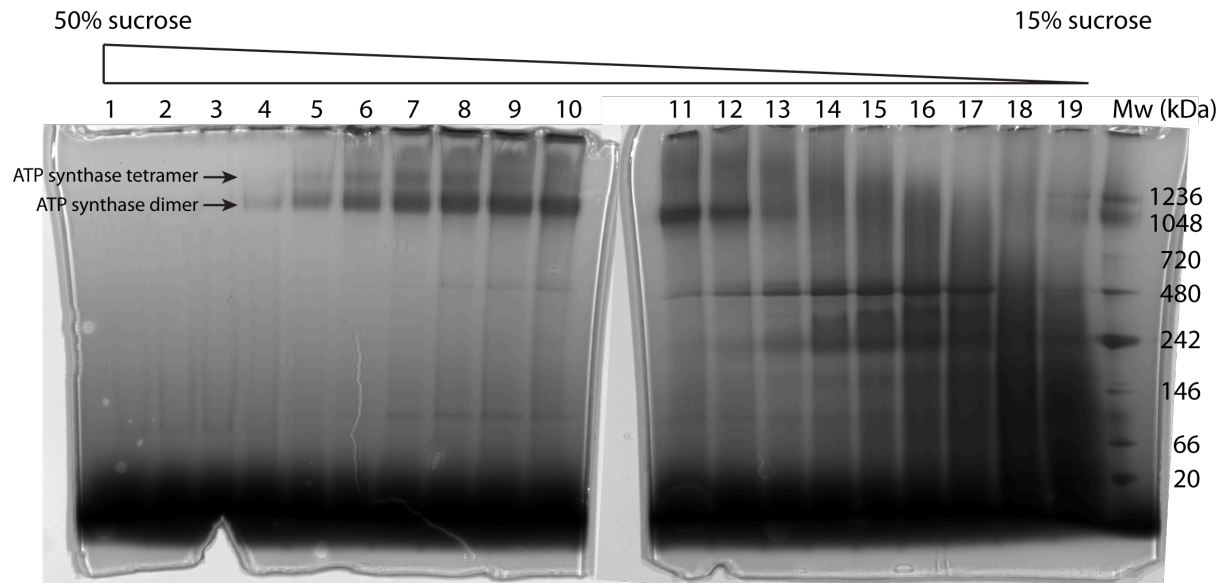

**Supplementary Fig. 1 | Digitonin-solubilized complexes analyzed with BN-PAGE.** Cleared digitonin-solubilized mitochondrial lysate was sedimented through 15-50% w/v sucrose gradients and all fractions (1-19) analyzed on blue-native PAGE gradient gels. Molecular weight (Mw) markers are shown in the right-most lane on the second gel. Fractions 5-8 (~35-40% w/v sucrose) show two bands, a major band (ATP synthase dimer) and a minor band a (ATP synthase tetramer) indicating successful solubilization of ATP synthase dimers and higher oligomers.



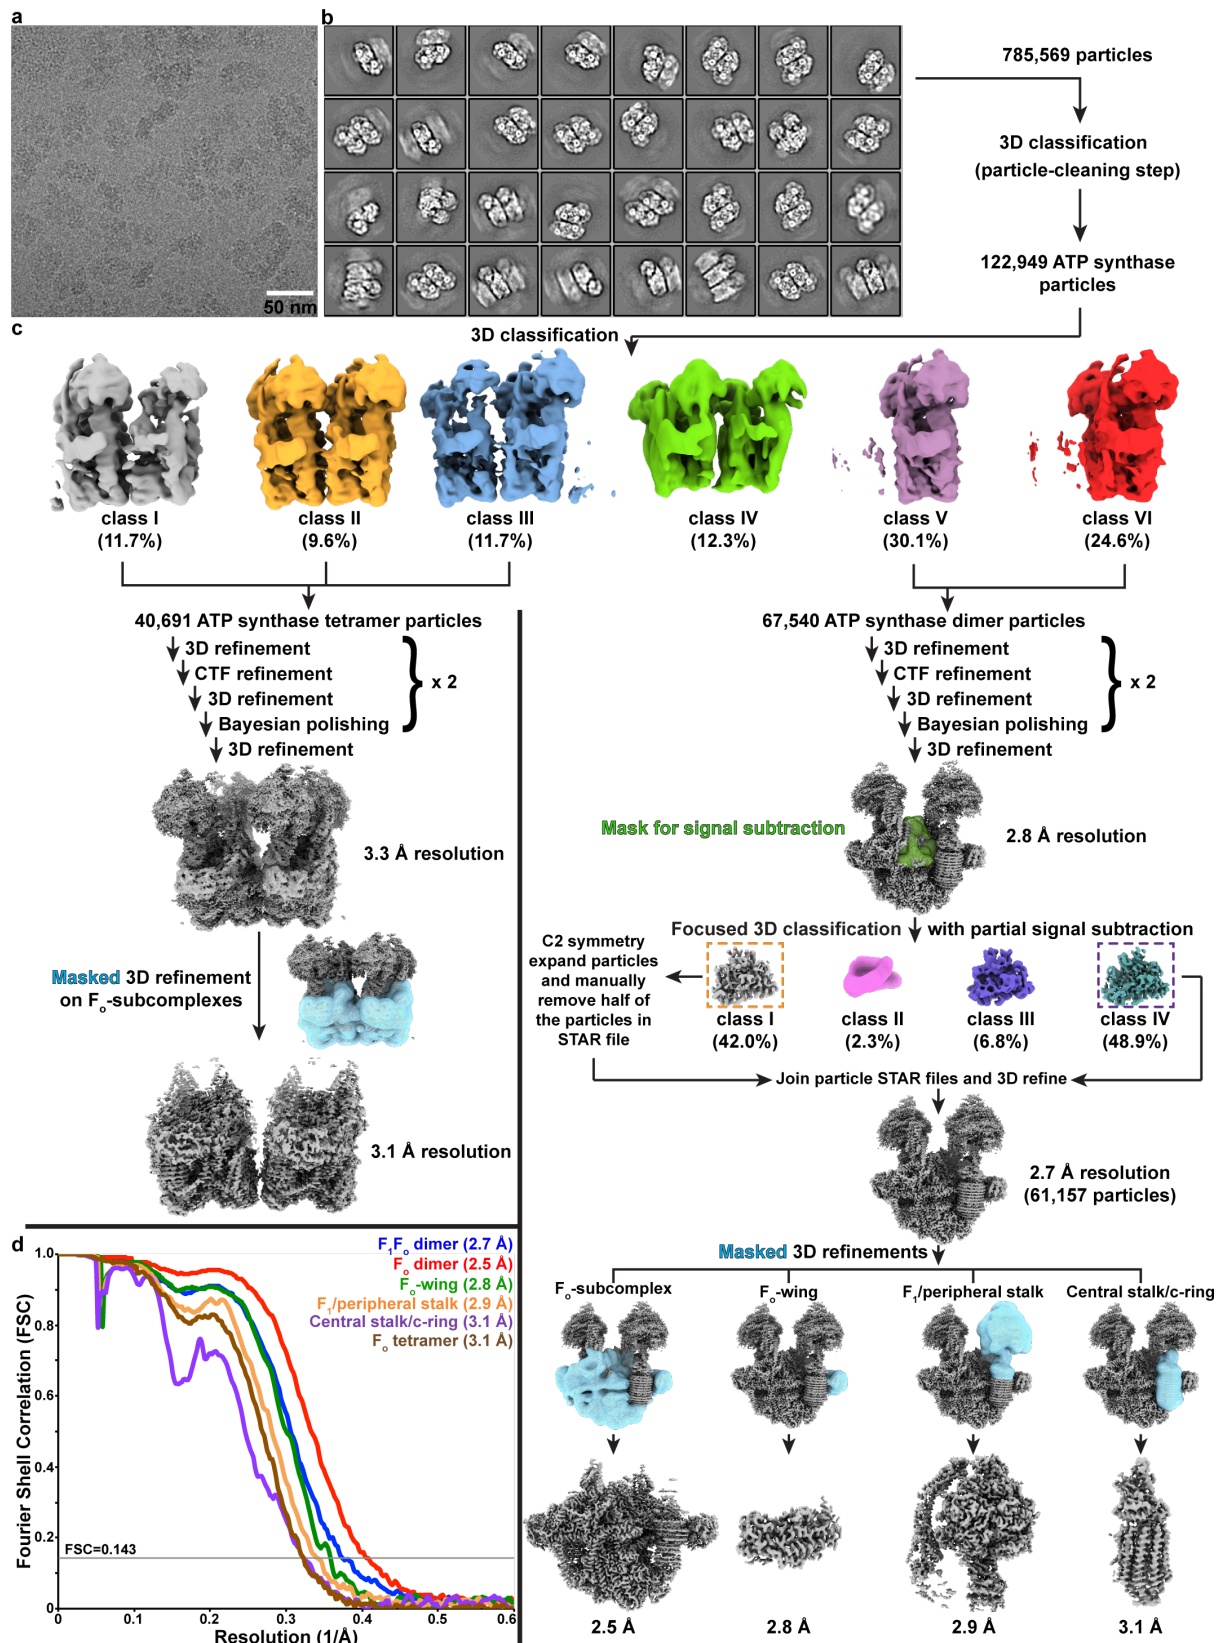

**Supplementary Fig. 2 | Cryo-EM data processing.** **a**, representative motion-corrected micrograph of ATP synthase particles. **b**, 2D class averages of ATP synthase particles. **c**, particle processing workflow in RELION-3.1. Left: image processing scheme of ATP synthase tetramer particles, right: processing of ATP synthase dimer particles. **d**, Fourier shell correlation from RELION postprocessing step of the final six reconstructions.

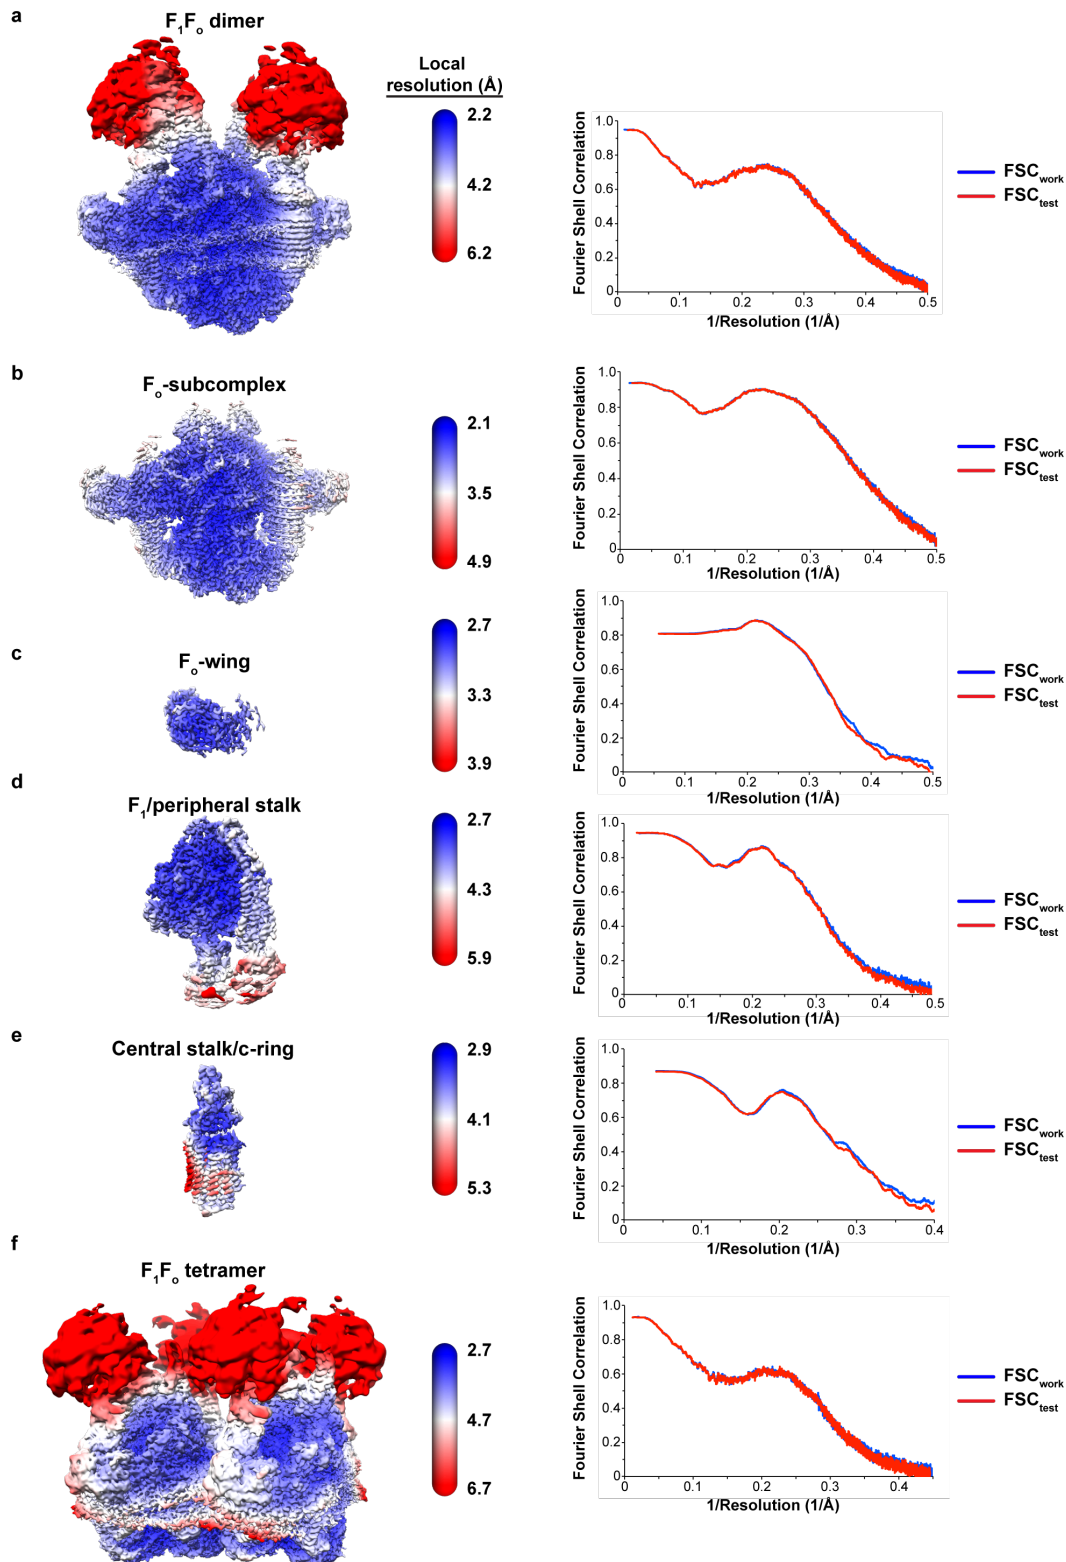

**Supplementary Fig. 3 | Local resolution of final reconstructions and map-model validation.** Left column shows the final reconstructions colored according to local resolution estimated using local resolution calculation in RELION. Right column shows Fourier shell correlations  $FSC_{work}$  and  $FSC_{test}$  for validation of models built and refined into the respective maps. **a**,  $F_1F_0$  dimer reconstruction. **b**,  $F_0$  dimer reconstruction. **c**,  $F_0$ -wing reconstruction. **d**,  $F_1$ /peripheral stalk reconstruction. **e**, central stalk/c-ring reconstruction. **f**,  $F_0$  tetramer reconstruction.

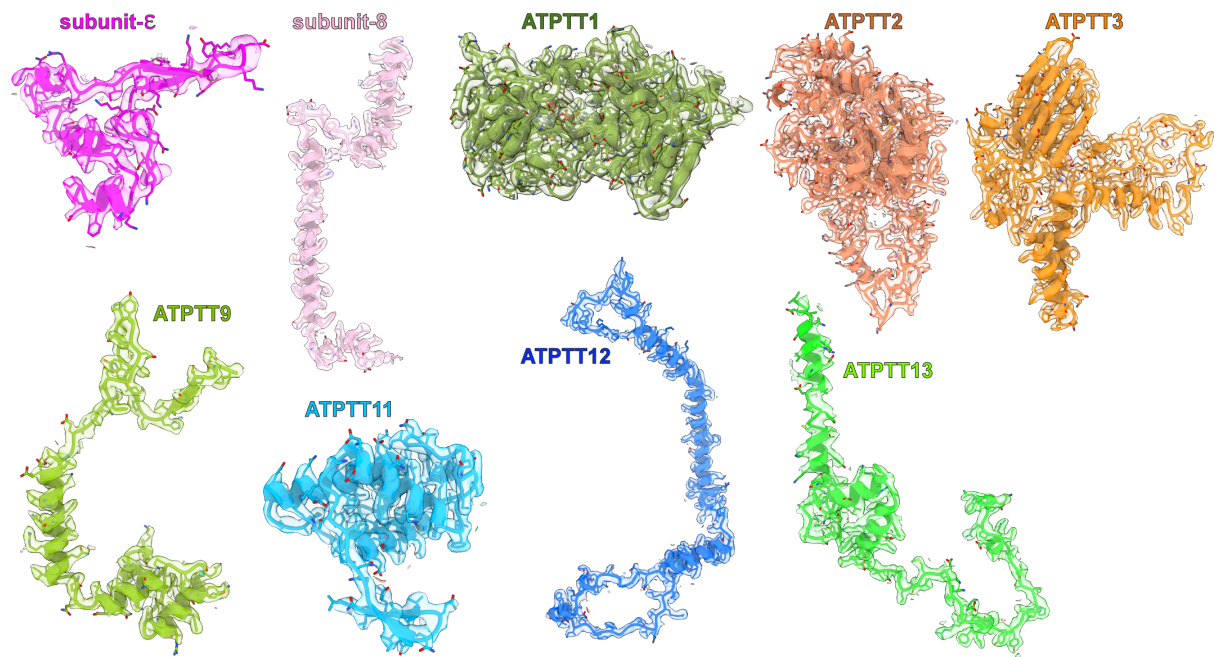

**Supplementary Fig. 4 | Newly discovered subunits in type III ATP synthase.** Subunits identified directly from the cryo-EM map are shown with local-resolution filtered density carved 2 Å around the model atoms.

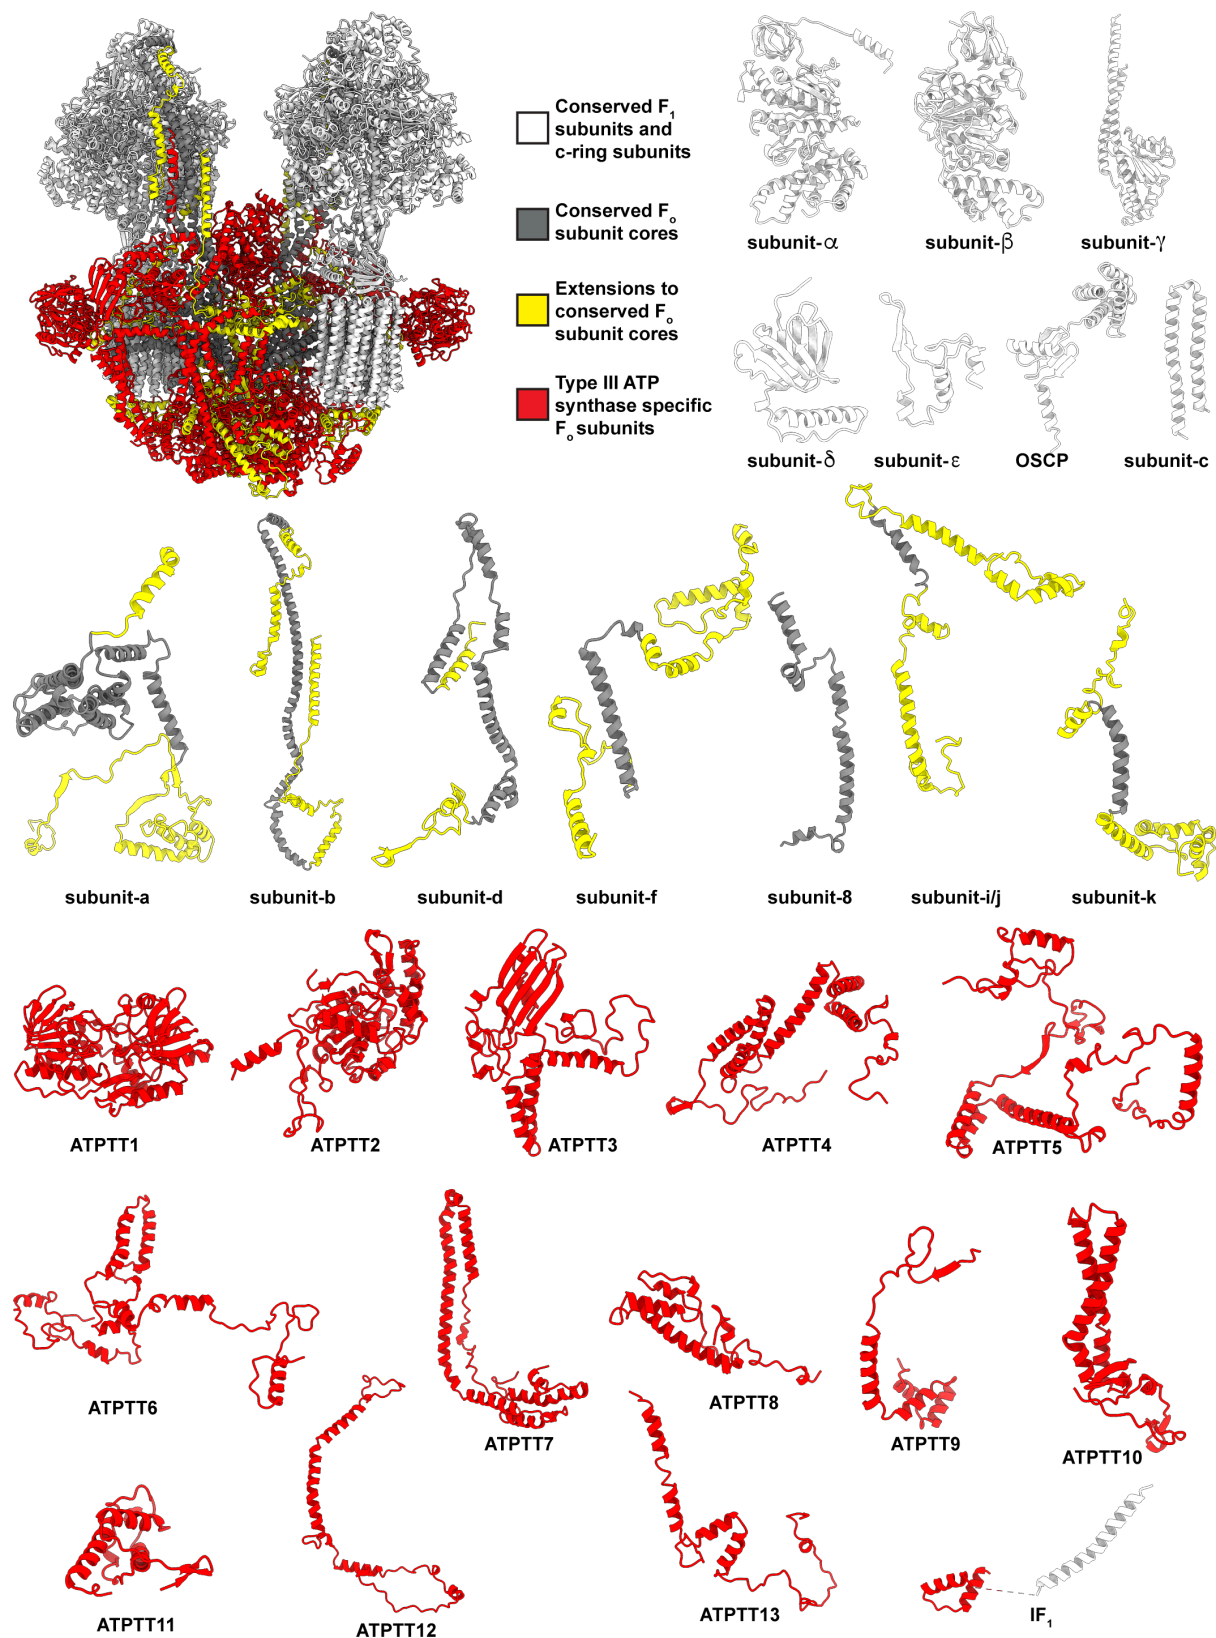

**Supplementary Fig. 5 | Individual subunits of the type III ATP synthase.** Tertiary folds of all the built proteins are shown. Conserved structures and core domains of  $F_1$  and  $F_0$  subunits are shown in white and grey, respectively. Extensions to  $F_0$  subunit cores are yellow and type III specific proteins are red.



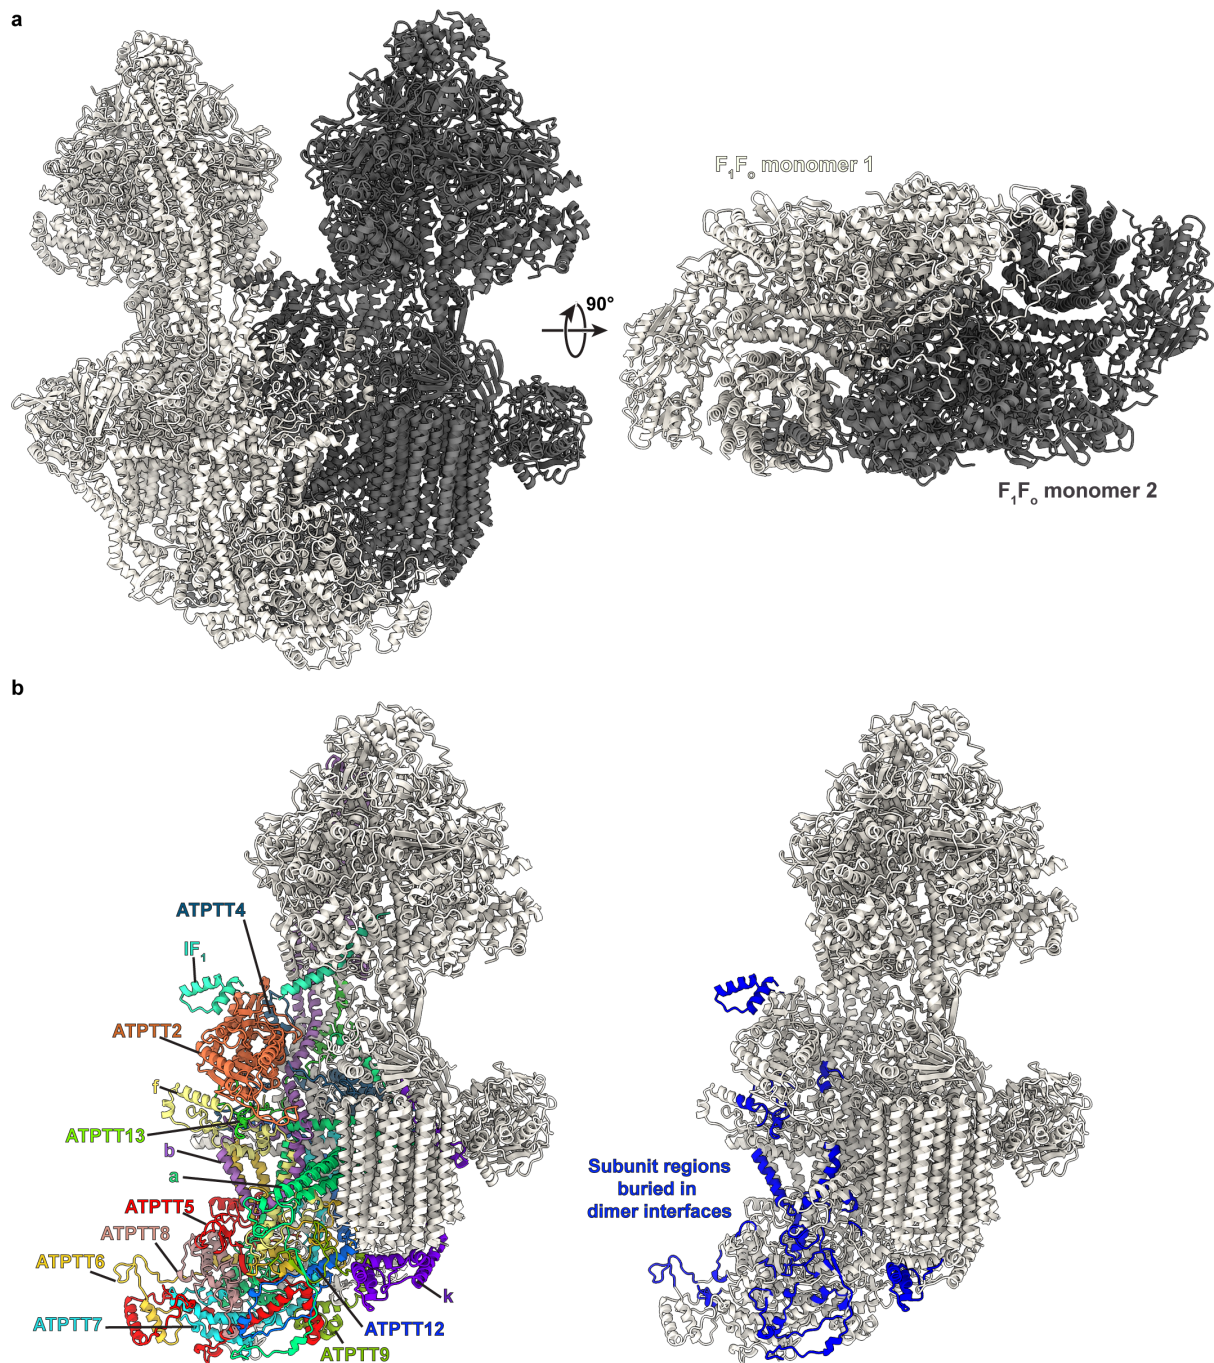

**Supplementary Fig. 6 | Dimerization of the type III ATP synthase. a**, two monomers are shown in white and grey, illustrating that the extensive dimerization occurs in the membrane, matrix, and lumen, providing the largest dimer interface reported for mitochondrial ATP synthase. **b**, View from the interface, left panel:  $F_0$  subunits in one monomer involved in dimer interface interactions are indicated; right panel: secondary structure elements forming direct contacts between the monomers are shown in blue.

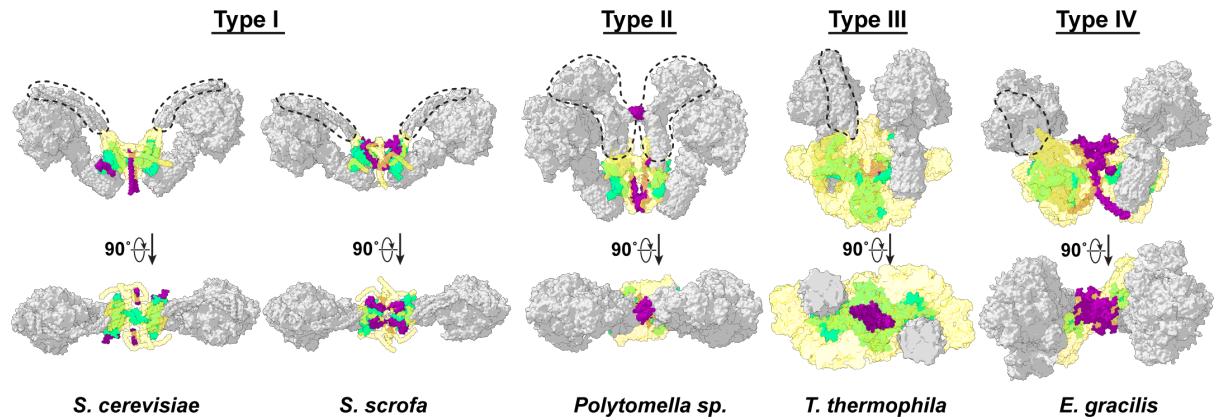

**Supplementary Fig. 7 | Comparison of dimerization modes between mitochondrial ATP synthases.** F<sub>1</sub>/c-ring and peripheral stalk are gray, F<sub>0</sub> subcomplex is transparent gold, subunit-*a* is green, F<sub>0</sub> subunit domains forming dimer interface are magenta. The peripheral stalks are encircled by dashed lines for orientation. In type III and type IV ATP synthase, the laterally offset peripheral stalks allows just one peripheral stalk to be seen. The following models were used: type I ATP synthase - *Saccharomyces cerevisiae* (PDB 6B8H) [<https://www.rcsb.org/structure/6B8H>], *Sus scrofa* (PDB 6J5K) [<https://www.rcsb.org/structure/6J5K>]; type II ATP synthase - *Polytomella sp.* (PDB 6RD4) [<https://www.rcsb.org/structure/6RD4>]; type III ATP synthase - current work; type IV ATP synthase *Euglena gracilis* (PDB 6TDU) [<https://www.rcsb.org/structure/6TDU>].

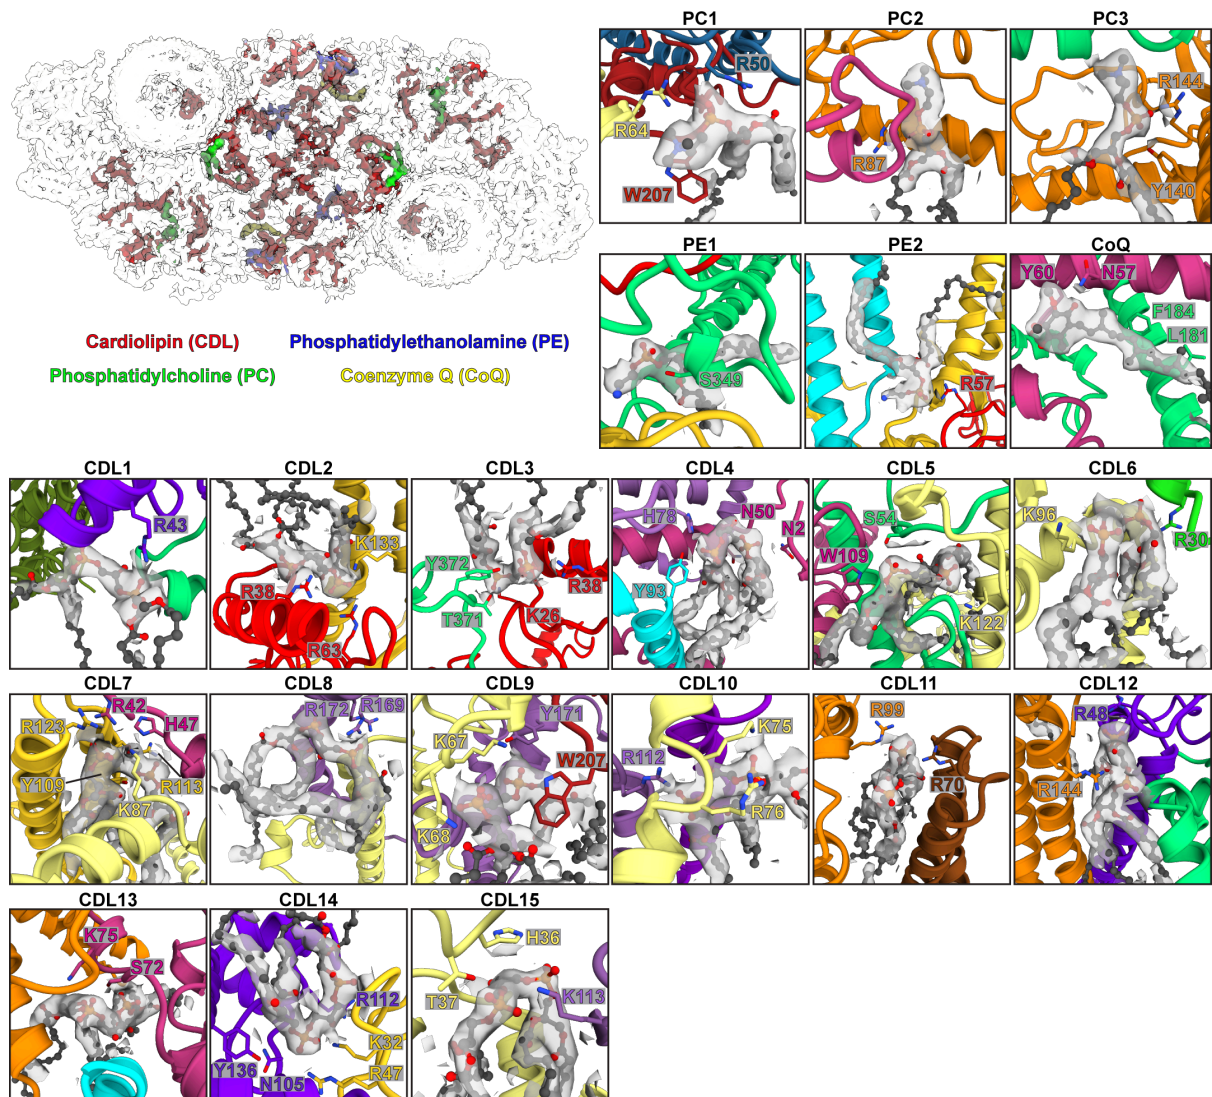

**Supplementary Fig. 8 | Binding sites for lipids and coenzyme Q in the ATP synthase dimer structure.** Overview of the density features of 30 cardiolipins, 6 phosphatidylcholines, 4 phosphatidylethanolamines, 2 CoQ molecules. All lipid/CoQ binding sites are  $C_2$ -symmetry related around the pseudo- $C_2$  symmetry axis of the  $F_0$ -subcomplex. Close-up views include density carved 2.6 Å around the lipid/CoQ molecule.



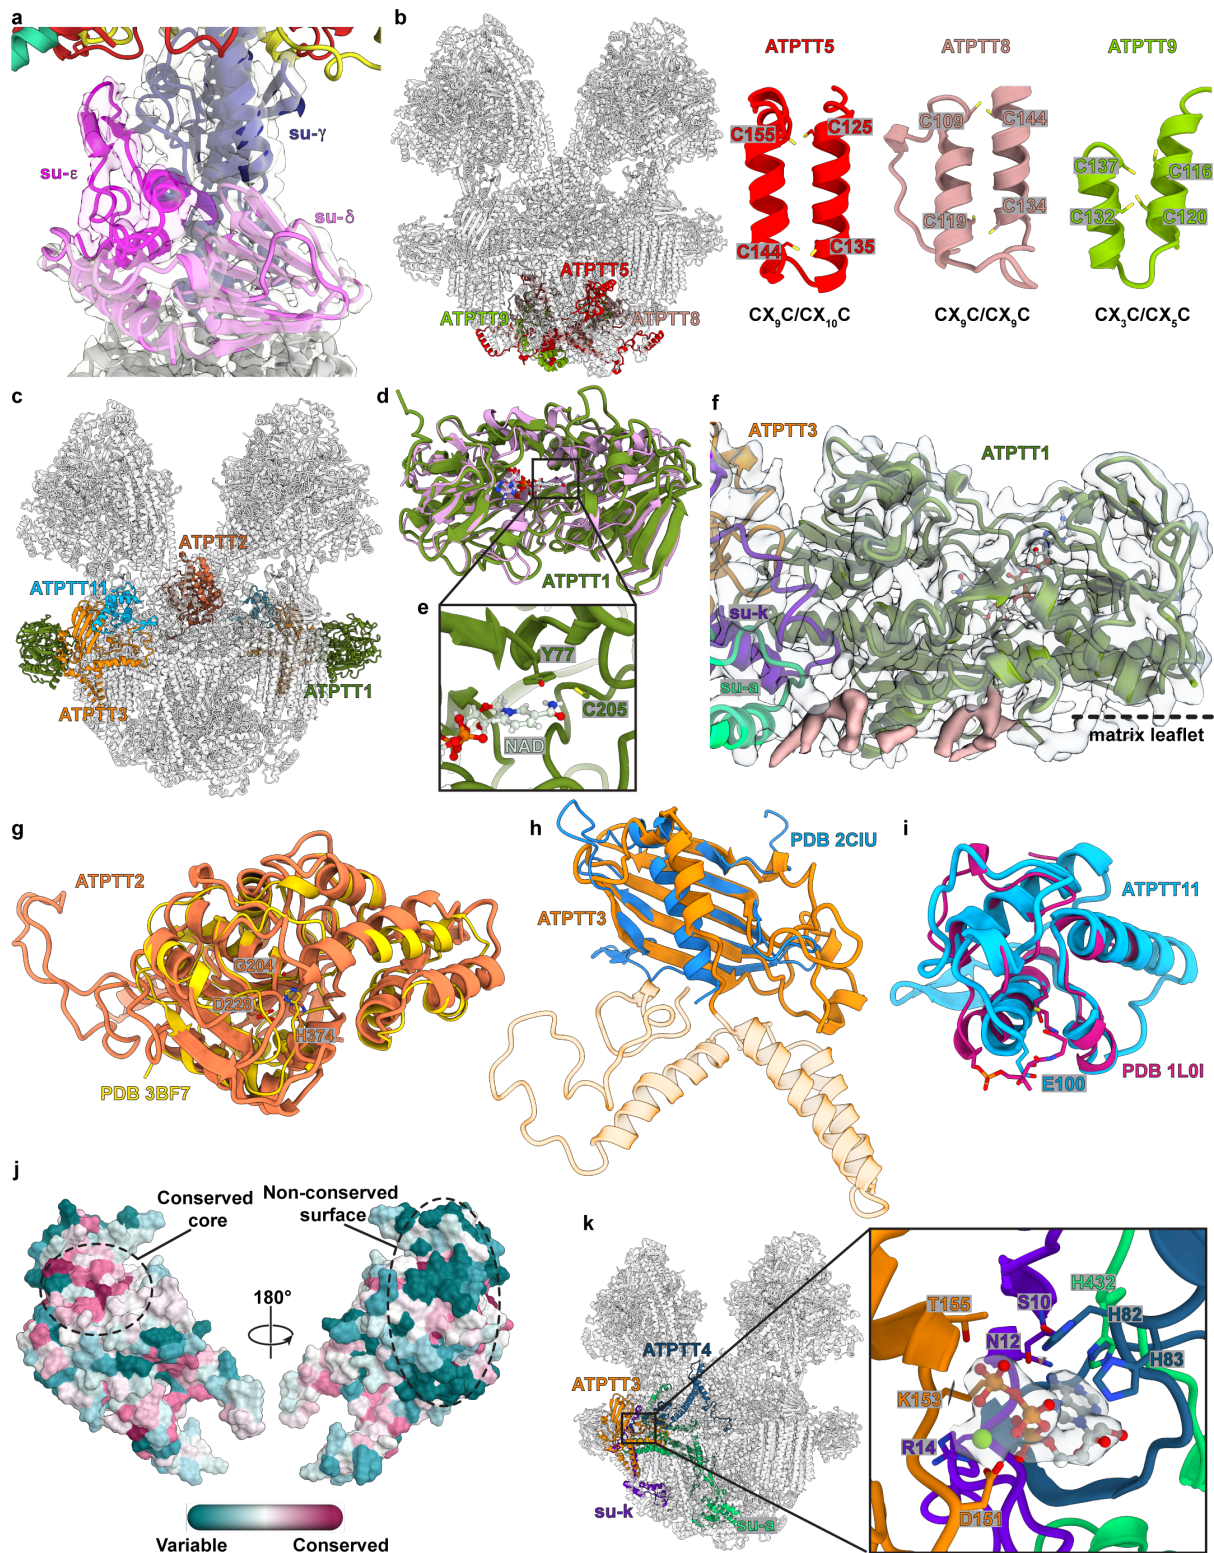

**Supplementary Fig. 9 | Features of newly identified subunits.** **a**, central stalk region highlighting density that allowed model building subunit- $\epsilon$  (magenta). **b**, locations and structures of ATPPT5 (red), ATPPT8 (light brown) and ATPPT9 (light green), with the identified CHCH-domains. **c**, overview showing location of matrix-side  $F_0$  subunits with conspicuous globular tertiary folds. **d**, ATPPT1 (green) superposed with the structure of human sulfide:quinone oxidoreductase (pink) (PDB 6MP5)



[<https://www.rcsb.org/structure/6MP5>]. **e**, nicotinamide group of NAD. **f**, ATPTT1 locates close to the matrix leaflet of the inner mitochondrial membrane. Protein density of the F<sub>o</sub>-wing map is shown as transparent surface with lipid/detergent density features colored light brown. **g**, ATPTT2 (orange-brown) superposed with the structure of *Escherichia coli*  $\alpha/\beta$ -hydrolase protein ybfF (yellow) (PDB 3BF7) [<https://www.rcsb.org/structure/3BF7>]. ATPTT2 contains an incomplete Ser-His-Asp catalytic triad with the Ser-residue mutated to Gly204. **h**, ATPTT3 contains a C-terminal fold (orange), which superposes with yeast TIM21 IMS-domain (blue) (PDB 2CIU) [<https://www.rcsb.org/structure/2CIU>]. **i**, ATPTT11 adopts a core fold of four helices superposing well with *E. coli* acyl-carrier protein (dark pink) (PDB 1L0I) [<https://www.rcsb.org/structure/1L0I>]. ATPTT11 contains a Glu100 residue instead of a serine, which normally conjugates with a phosphopantetheine group. **j**, ATPTT2 colored by sequence-conservation calculated using ConSurf. Residues at the core display a high degree of conservation whereas the surface residues are more variable. **k**, F<sub>o</sub>-bound Mg-ATP ligand.

**a**

```
Tetrahymena thermophila (ATPTT2) 1 MRMEYLQSEKKDANKQIHKKEEKEEKEIKIKRKNKVKQRIQIINQIKKYIEAKQQKQIQSKNQKRYKGRMINTRKQVFKCLWGAQPAYNFSRIINHLRGGPVYQDNTKDVSLRGT 118
Paramoecium tetraurelia (A0EHD3) 1 -----MYRFQLWK-----FST-LQFHKGVSSEYQSVSENVVLRGV 34
Ichthyophthirius multifiliis (G0QWZ8) 1 -----
Stentor coeruleus (A0A1R2D379) 1 -----MLRY--FSSKFTQASDKLQLRGT 21

Tetrahymena thermophila (ATPTT2) 119 FLRKYDLDLPTMIFTEACDLTANWIFFEINPOYDILAHNRVWLLNPRNFGNSDRHPSFDLQEMSDVVRMFYSOKISMATLGGHIGGKIALAVGCVYHAERVTGVFSIISSPMDORY 236
Paramoecium tetraurelia (A0EHD3) 35 TLKGRYNDLENLFFTEACDLVENWIFFESDENNKILDYRNWHLSPRNFGTSDAHYFEDVQQLANDVVRMYNKTMTATLSGHPGARVALAAGCYHPTFCVFCIISPMORY 152
Ichthyophthirius multifiliis (G0QWZ8) 1 -----MFFYSOKISYVTLAHHKIAKIALAVGCVYHAERVTGVFSIISSPMDORY 50
Stentor coeruleus (A0A1R2D379) 22 LKSTSNMPTILAFDLENPDSLRLEFN---KKLEVRVWVLSYRNSWLSERNSEMEPEELADDVIRFMDKHKITTASVIGSIFGGKIAVITGILKYHRIISVWVSLIISYSPMLTE 136

Tetrahymena thermophila (ATPTT2) 237 HEAFKDFGVVALDTEINFKWSDKDVVFLKREIKOPKRSIFTNISNNAKTQ--SUSFMEINYLHNLNFKADSLGNWAVRNGIYTGAAHIFPPEYSRWVHLAINTLPMKVKCA 353
Paramoecium tetraurelia (A0EHD3) 153 HEATTEFKYIAKLSQINIKELITSQESYKLDKIDCPKRSIFSNLILKPLSGI--WQWYALKLTDQVSNFKADSLIAPFELKAGLFTGHTHEAPPEFSRWVHLGINTLPMKVKCP 268
Ichthyophthirius multifiliis (G0QWZ8) 51 HSEFKDFKGYINELTQIDFNWQOKDILLELKDIDKPKRSIFSNLIVQNAKQ--NQFGLEQYLNHLQRNKADSLGHVVEKHGMPFGRVNEIFPPEYSRWVHLAINTLPMKVKCA 166
Stentor coeruleus (A0A1R2D379) 137 HVAYKELKNVAVFVSKLPLITRA--SIDAQVRKNIKNTLQRTIMGNLAEDSKQLYRSGNELSLAMN--AKDKRKNIGKPF-LIGLYPGRAMELYAERSPVHMSSMIIETIYNLFF 250

Tetrahymena thermophila (ATPTT2) 354 RV-KGFCHDIFYVQDENLNLNHWYDFENYANVVVSKLAKLHSHVGVVALLKDRTETIENMIFDRIKERN---D-----SKHIYGDYSFAHLHNNRNHIEKHDELKDLKLEQ 460
Paramoecium tetraurelia (A0EHD3) 269 QV-RGFGDVHVSQCDNNTLNHWIYDFDSQSVFASRFTKFLSLMYDGVHLLKDRTEVGGKFFVPSIYSKK---D-----PNHIYSDYSFAHYHNNRNHIVKNDLTPNK----- 370
Ichthyophthirius multifiliis (G0QWZ8) 167 RV-KGFCHDIFYVQDENLNLNHWIYDFDSQSVVHRFLKAITAYDGVHLLQDRSEVGGKFCIPDRKSRTHISQ-----ASHVYGDYTPAHLHNNRNHIEEHDKMDQQLK- 275
Stentor coeruleus (A0A1R2D379) 251 VLYRTRYRFDHYDTLNHN---LHLTEHAPSIRRIAEIYRWFQGVHLLKDRSHIGKVSVEIRSRNDLIPNEKFLDEVGDAYVFKMIIRKHNHNYATNKIQIP----- 354
```

**b**

```
Tetrahymena thermophila (IF1) 1 MNRSVNIANKLIQTYEAMSVQSRFAF-STREEEWLOKRTSQEKEYDDEBRAMKRL 57
Paramoecium tetraurelia (A0EGJ0) 1 -----MNFLLITLARIKCPQRFGE-A----DVLKDKDNGDERVVFTEKDKRLMSKL 47
Ichthyophthirius multifiliis (G0R009) 1 MFLMIRTLKQVLOQSLRLTPKYQF-SKHEDDNLNKHSHSKELFTQEDQKMKKL 57
Stentor coeruleus (A0A1R2D4P0) 1 HF-----IVRSRALVVRVNSNGIEDVVGKGSSEDIYESSKRETKKL 48

Tetrahymena thermophila (IF1) 58 LEKLNITTSKPFVEDS-EYLAPQNLEVENLKKYHINYTOALIDELVDNWKIGN----- 108
Paramoecium tetraurelia (A0EGJ0) 48 LKMKENNEKPKSSGSDNDEKEDLQKTFSRKYNTOALIEVNLNKRGD----- 98
Ichthyophthirius multifiliis (G0R009) 58 LEKLSQSKVVEDV-EHETSDAQVQVLEQRNFSPEALIEETDVKQRNKRKDD 114
Stentor coeruleus (A0A1R2D4P0) 49 MEKLDQAIPEESNPPVLIKARDNLVCLIRKHNLRPEGLVDLMMNRVGH----- 99
```

**Supplementary Fig. 10 | Sequence alignments of ciliate ATPTT2 and IF<sub>1</sub>.** **a**, Clustal-Omega sequence alignment of *T. thermophila* ATPTT2 sequence with corresponding candidate sequences in other ciliate organisms (left side). UniProt entries for ATPTT2-candidate sequences are shown in brackets. Conserved residues of the inactive catalytic triad are shown in colored boxes marked by asterisks. **b**, Clustal-Omega sequence alignment of *T. thermophila* IF<sub>1</sub> sequence with corresponding candidate sequences in other ciliate organisms (left side). UniProt entries for IF<sub>1</sub>-candidate sequences are shown in brackets. Conserved residues in the C-terminal region important for dimerization are marked by black asterisks.

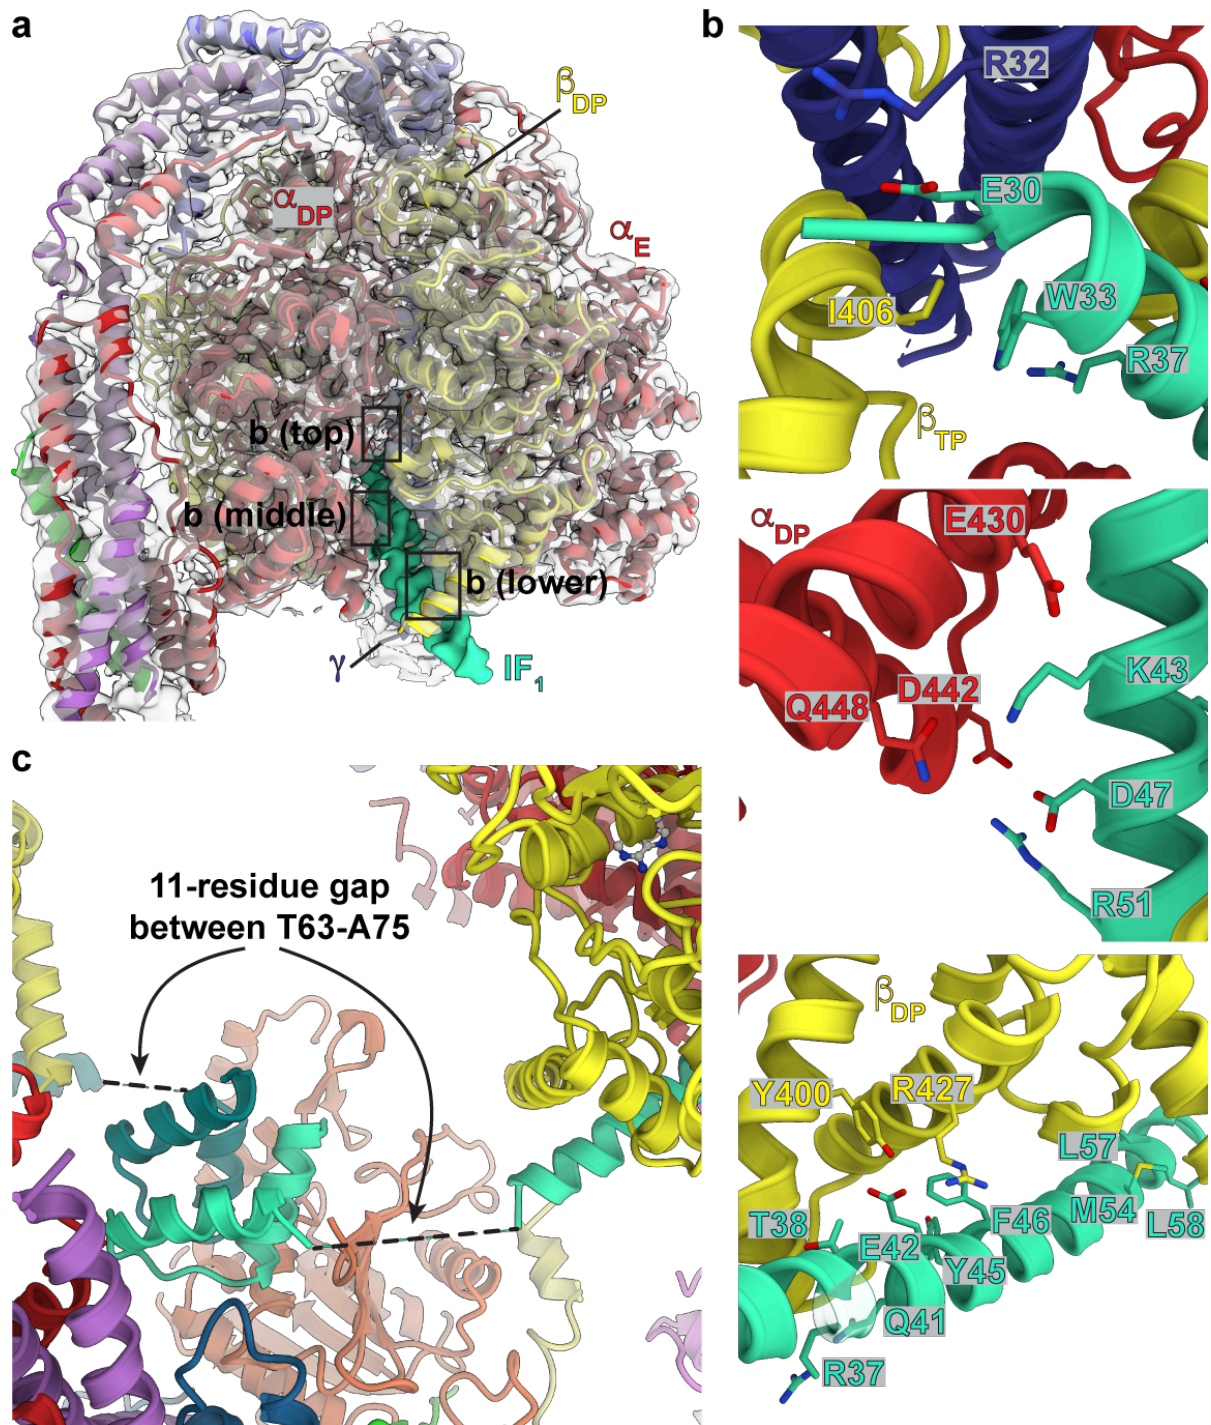

**Supplementary Fig. 11 | IF<sub>1</sub> is bound to F<sub>1</sub>- and F<sub>0</sub>-subcomplexes.** **a**, F<sub>1</sub>/peripheral stalk model in colors and local resolution-filtered cryo-EM map in transparent gray. IF<sub>1</sub> density colored green-cyan is observed bound to the  $\beta_{DP}$  subunit extending to the  $\gamma$  subunit (dark blue). Windowed regions indicated the regions for close-up views shown in **b** panels. **b**, IF<sub>1</sub> interactions in the F<sub>1</sub>-subcomplex to subunit  $\gamma$  and subunit  $\beta_{TP}$  (top panel), subunit  $\alpha_{DP}$  (middle panel) and the extensive interface with subunit  $\beta_{DP}$  (lower panel). **c**, a gap of 11 residues was not resolved in the cryo-EM density maps between the IF<sub>1</sub> N-terminal helix projecting from the F<sub>1</sub>-subcomplex and the F<sub>0</sub>-bound C-terminal homodimer.

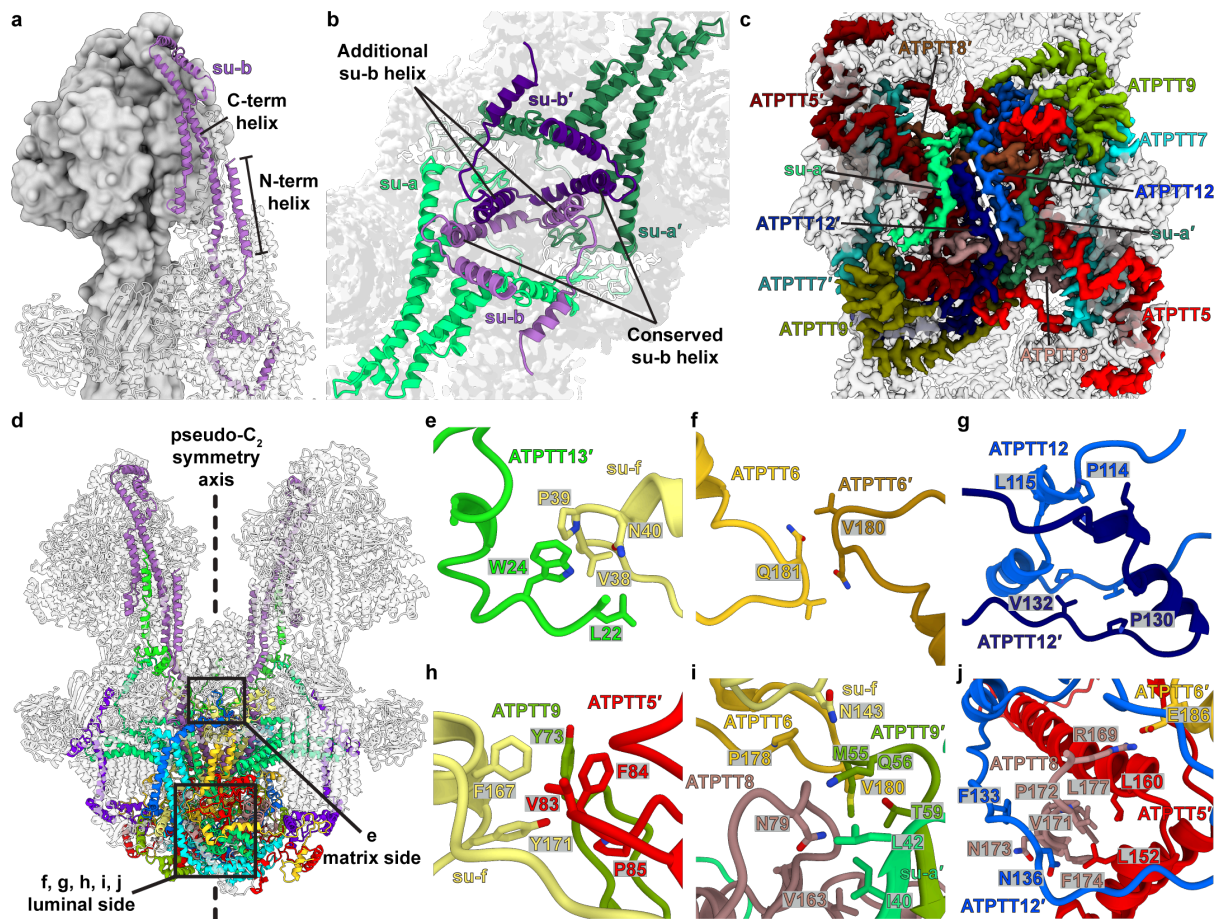

**Supplementary Fig. 12 | Extensions of subunit-*a* and -*b* and dimer interfaces.** **a**, subunit-*b* expands the peripheral stalk structure through an extended N-terminal helix, which together with the canonical C-terminal helix comprises the major part of the peripheral stalk. **b**, matrix view showing how subunit-*a* interacts with the canonical helix of conserved subunit-*b* as well as with a non-canonical helix of subunit-*b*'. **c**, luminal view showing the N-terminal extensions of both subunit-*a* copies tying together the F<sub>0</sub>-subcomplex by interacting with symmetry-related F<sub>0</sub> subunits. Dashed white line indicates the border between symmetry related monomers. **d**, overview of ATP synthase dimer highlighting F<sub>0</sub> subunits involved in dimer interfaces. Windows show locations of panel e-j close-up views. **e**, matrix-side dimer interface between subunit-*f* and ATPPT13'. **f,g**, dimer interface between symmetry-related ATPPT6, ATPPT12. **h-j**, dimer interface between symmetry-unrelated subunits.



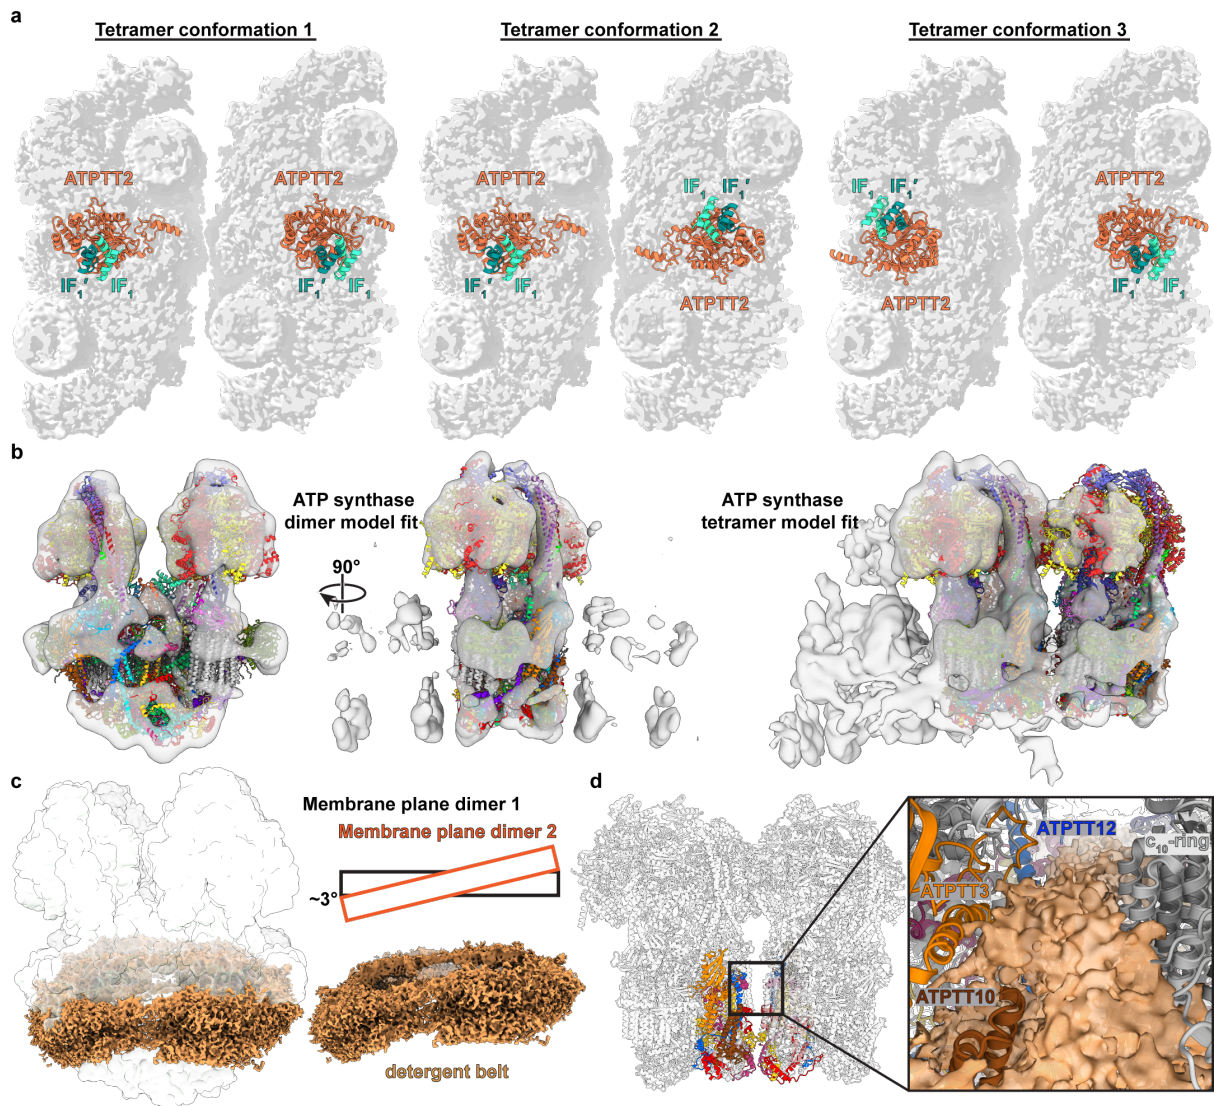

**Supplementary Fig. 13 | Multiple conformations of type III ATP synthase tetramer.**  
**a**, matrix view of the type III ATP synthase tetramer in three conformations brought about by the pseudo-symmetric nature of the dimer. F<sub>0</sub> subunit ATPPT2 and IF<sub>1</sub> C-terminal dimer are shown in colored ribbons. **b**, ATP synthase dimer and tetramer atomic models fitted into subtomogram average (EMD-3441) [<https://www.ebi.ac.uk/pdbe/entry/emdb/EMD-3441>]. The tetramer model was fitted with one dimer copy to the density map, showing the second dimer copy in the model to agree with density of a second dimer in the reconstruction. **c**, end-view of ATP synthase tetramer (transparent light grey) with detergent/membrane density (light brown). Isolated detergent/membrane density shows the curvature induced by the ATP synthase tetramer, ~3° between dimer membrane planes **d**, lipid-mediated tetramer interface between F<sub>0</sub> subunits ATPPT3, ATPPT10 and ATPPT12 in one dimer copy and the c-ring in the second dimer copy. Unmodeled lipid density is colored in light brown.

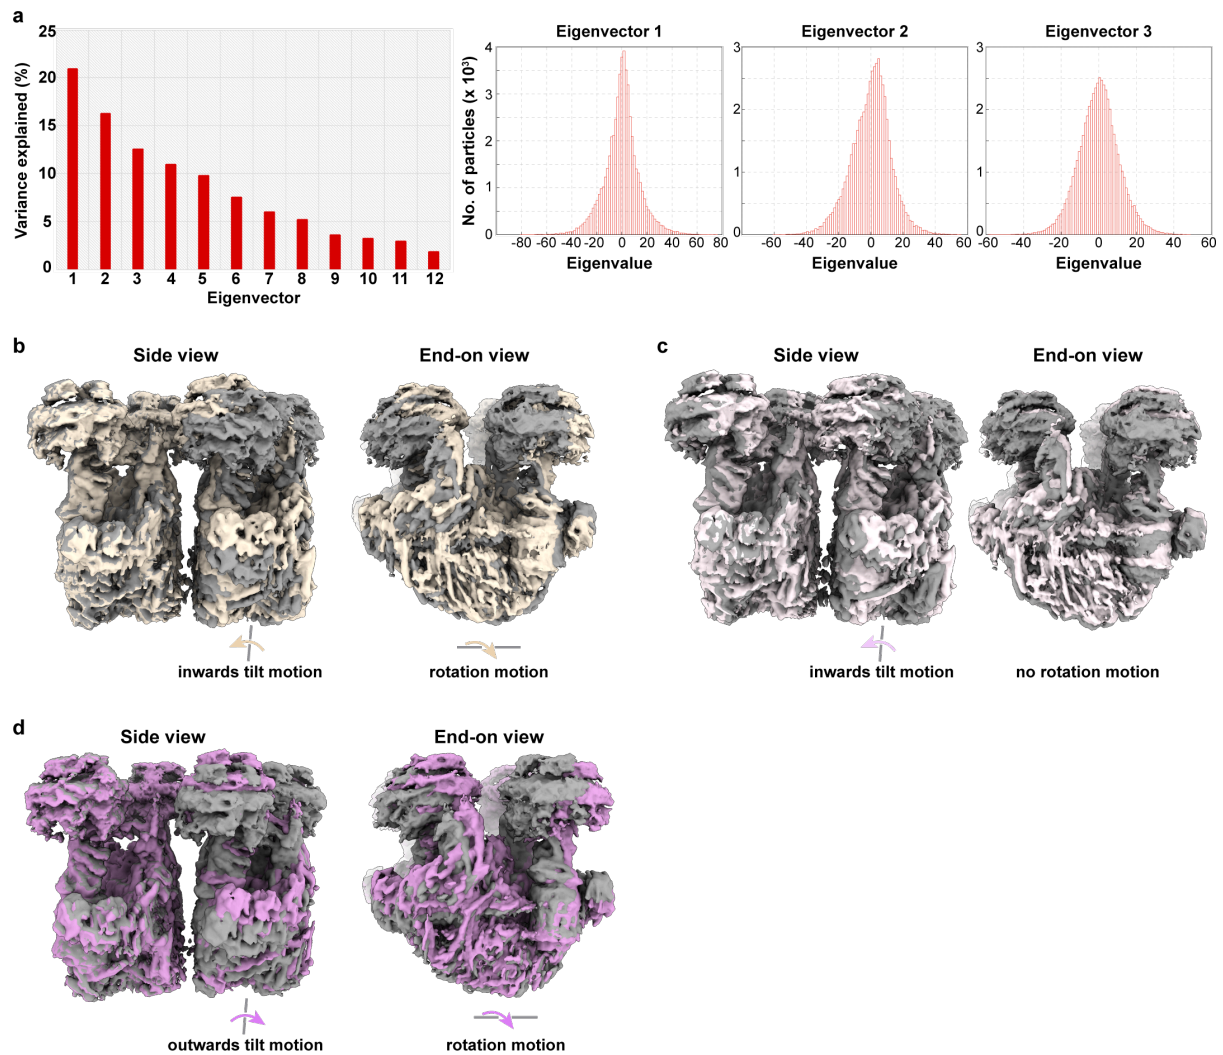

**Supplementary Fig. 14 | Multi-body refinement analysis.** **a**, left-side panel shows the multi-body refinement output from RELION-3.1 of the variance explained by eigenvectors. The first three eigenvectors together explain approximately 49% of the motion or flexibility in the ATP synthase tetramer particles. The last 9 eigenvectors account for the remaining ~51% of motion, making the interpretation non-trivial. Right-side panels show histograms of the eigenvalue distributions of the first three eigenvector components. The mono-model distributions indicate continuous motions with no distinct states. **b-d**, side and end-on views of reconstructions showing the motion along eigenvector 1 (**b**), eigenvector 2 (**c**) and eigenvector 3 (**d**) with start (grey) and end (colors) as the two extremes. As clearly seen in the side views, reconstructions are aligned on dimer to highlight the motion of one dimer with respect to the other. **b**, the motion along eigenvector 1 is a combination of an inwards tilt motion together with a rotation motion. **c**, the motion along eigenvector 2 consists mainly of an inward tilt motion with no obvious rotation motion. **d**, the motion along eigenvector 3 is a combination of one dimer tilting outwards while also rotating.

Supplementary Table 1

| Data collection                       | F <sub>1</sub> F <sub>0</sub><br>dimer | F <sub>0</sub> dimer | F <sub>0</sub> -wing | F <sub>1</sub> /peripheral<br>stalk | c-ring/central<br>stalk | F <sub>0</sub> tetramer |
|---------------------------------------|----------------------------------------|----------------------|----------------------|-------------------------------------|-------------------------|-------------------------|
| Microscope                            | Titan Krios                            |                      |                      |                                     |                         |                         |
| Voltage (kV)                          | 300                                    |                      |                      |                                     |                         |                         |
| Camera                                | K2 Summit                              |                      |                      |                                     |                         |                         |
| Magnification                         | 165,000                                |                      |                      |                                     |                         |                         |
| Exposure (e-/Å <sup>2</sup> )         | 30.9                                   |                      |                      |                                     |                         |                         |
| Pixel size (Å)                        | 0.83                                   |                      |                      |                                     |                         |                         |
| Defocus range (µm)                    | 0.6-2.6                                |                      |                      |                                     |                         |                         |
| Movies collected                      | 15439                                  |                      |                      |                                     |                         |                         |
| Frames / movie                        | 20                                     |                      |                      |                                     |                         |                         |
| <b>Data processing</b>                |                                        |                      |                      |                                     |                         |                         |
| Initial particles                     | 122,949                                |                      |                      |                                     |                         | 122,949                 |
| Final particles                       | 61,157                                 |                      |                      |                                     |                         | 40,691                  |
| Symmetry                              | C1                                     | C1                   | C1                   | C1                                  | C1                      | C2                      |
| Map resolution (Å)                    | 2.7                                    | 2.5                  | 2.8                  | 2.9                                 | 3.1                     | 3.1                     |
| - FSC threshold                       | 0.143                                  | 0.143                | 0.143                | 0.143                               | 0.143                   | 0.143                   |
| B-factor sharpen                      | -12.6                                  | -12.5                | -18.5                | -26.2                               | -54.2                   | -53.0                   |
| EMD-ID                                | 10860                                  | 10859                | 10857                | 10862                               | 10858                   | 10861                   |
| <b>Model refinement statistics</b>    |                                        |                      |                      |                                     |                         |                         |
| CC (map/model)                        | 0.72                                   | 0.88                 | 0.88                 | 0.87                                | 0.82                    | 0.64                    |
| Resolution (map/model)                | 2.59                                   | 2.53                 | 2.93                 | 3.05                                | 3.43                    | 3.39                    |
| - FSC threshold                       | 0.5                                    | 0.5                  | 0.5                  | 0.5                                 | 0.5                     | 0.5                     |
| Atoms (not H)                         | 142054                                 | 69840                | 3439                 | 27681                               | 8955                    | 284108                  |
| Residues                              | 17337                                  | 7929                 | 417                  | 3598                                | 1176                    | 34674                   |
| Lipids/CoQ                            | 40/2                                   | 40/2                 | -                    | -                                   | -                       | 80/4                    |
| ATP/ADP/NAD                           | 8/4/2                                  | 2/-/2                | -/-/1                | 3/2/-                               | -                       | 16/8/4                  |
| Mg-ions                               | 12                                     | 2                    | -                    | 5                                   | -                       | 24                      |
| <b>Model B-factor (Å<sup>2</sup>)</b> |                                        |                      |                      |                                     |                         |                         |
| - Protein                             | 76.03                                  | 59.29                | 76.61                | 84.04                               | 115.19                  | 76.03                   |
| - Lipids                              | 65.27                                  | 64.22                | -                    | -                                   | -                       | 65.27                   |
| - Ligands                             | 65.27                                  | 64.22                | 76.76                | 67.32                               | -                       | 65.27                   |
| Rotamer outliers (%)                  | 0.28                                   | 0.30                 | 1.67                 | 0.27                                | 0.63                    | 0.28                    |
| <b>Ramachandran (%)</b>               |                                        |                      |                      |                                     |                         |                         |
| - Outliers                            | 0.01                                   | 0.00                 | 0.00                 | 0.00                                | 0.00                    | 0.01                    |
| - Allowed                             | 2.15                                   | 2.29                 | 6.02                 | 3.67                                | 2.26                    | 2.16                    |
| - Favoured                            | 97.84                                  | 97.71                | 93.98                | 96.33                               | 97.74                   | 97.83                   |
| Clash score                           | 2.26                                   | 1.57                 | 3.70                 | 4.85                                | 6.58                    | 2.36                    |
| MolProbity score                      | 1.04                                   | 0.97                 | 1.73                 | 1.50                                | 1.42                    | 1.05                    |
| <b>RMSD</b>                           |                                        |                      |                      |                                     |                         |                         |
| - Bonds (Å)                           | 0.003                                  | 0.005                | 0.008                | 0.005                               | 0.004                   | 0.002                   |
| - Angles (°)                          | 0.500                                  | 0.600                | 0.695                | 0.568                               | 0.664                   | 0.483                   |
| EMRinger score                        | 4.21                                   | 5.88                 | 5.38                 | 3.79                                | 2.33                    | 2.92                    |
| PDB ID                                | 6YNY                                   | 6YNX                 | 6YNV                 | 6Y00                                | 6YNW                    | 6YNZ                    |

**Supplementary Table 2**

| Subunit name                     | Gene name       | UniProt ID | Residues in total | Residues built | Location of subunits* | Comments                      |
|----------------------------------|-----------------|------------|-------------------|----------------|-----------------------|-------------------------------|
| <b>F<sub>1</sub> subcomplex:</b> |                 |            |                   |                |                       |                               |
| $\alpha$                         | TTHERM_00571860 | Q24HY8     | 546               | 32-545         | MA                    |                               |
| $\beta$                          | TTHERM_00585260 | I7LZV1     | 497               | 27-496         | MA                    |                               |
| $\gamma$                         | TTHERM_00118610 | Q22Z05     | 299               | 24-298         | MA                    |                               |
| $\delta$                         | TTHERM_01094890 | Q22ZH1     | 158               | 24-157         | MA                    |                               |
| $\epsilon$                       | TTHERM_00682930 | I7MMW3     | 71                | 2-69           | MA                    |                               |
| OSCP                             | TTHERM_00684790 | I7MMI7     | 219               | 32-219         | MA                    |                               |
| IF <sub>1</sub>                  | TTHERM_00145490 | I7M7C0     | 108               | 28-63 + 75-106 | MA                    |                               |
| <b>F<sub>0</sub> subcomplex:</b> |                 |            |                   |                |                       |                               |
| a                                | ymf66           | Q951C1     | 446               | 14-446         | MA+ME+CL              |                               |
| b                                | TTHERM_00127260 | I7MJ84     | 381               | 27-380         | MA+ME                 |                               |
| c                                | atp9            | Q951A5     | 76                | 1-75           | ME                    |                               |
| d                                | TTHERM_01188360 | Q239R1     | 234               | 29-234         | MA+ME                 |                               |
| f                                | TTHERM_00571670 | Q24I07     | 204               | 2-201          | MA+ME+CL              |                               |
| i/j                              | TTHERM_00529760 | I7LZW2     | 209               | 1-209          | MA+ME+CL              |                               |
| k                                | TTHERM_00823660 | I7LSX6     | 179               | 1-179          | MA+ME+CL              |                               |
| 8                                | ymf56           | Q950Y8     | 100               | 4-99           | MA+ME                 |                               |
| ATPTT1                           | TTHERM_00137990 | I7LVQ8     | 480               | 27-443         | MA                    | Rossmann fold                 |
| ATPTT2                           | TTHERM_00145440 | I7M7B9     | 460               | 94-458         | MA                    | $\alpha/\beta$ hydrolase fold |
| ATPTT3                           | TTHERM_00136220 | I7M8Q3     | 286               | 31-286         | MA+ME                 | TIM21 IMS fold                |
| ATPTT4                           | TTHERM_00486310 | I7MCZ0     | 268               | 38-268         | MA                    |                               |
| ATPTT5                           | TTHERM_01528510 | Q228N4     | 273               | 5-273          | CL                    | CHCHD fold                    |
| ATPTT6                           | TTHERM_00649060 | I7MCQ6     | 247               | 2-247          | ME+CL                 |                               |
| ATPTT7                           | TTHERM_00316290 | I7M980     | 221               | 1-221          | ME+CL                 |                               |
| ATPTT8                           | TTHERM_00289380 | I7LVK6     | 179               | 61-179         | CL                    | CHCHD fold                    |
| ATPTT9                           | TTHERM_01001220 | Q24HK1     | 154               | 55-153         | CL                    | CHCHD fold                    |
| ATPTT10                          | TTHERM_00825290 | I7LZE5     | 152               | 2-151          | ME+CL                 |                               |
| ATPTT11                          | TTHERM_00927010 | Q22DV8     | 152               | 45-152         | MA                    | Acyl-carrier fold             |
| ATPTT12                          | TTHERM_00068120 | I7M0G0     | 149               | 5-149          | MA+ME+CL              |                               |
| ATPTT13                          | TTHERM_00444800 | I7MLU7     | 145               | 22-145         | MA                    |                               |

\*MA=matrix, ME=membrane, CL=crista lumen
